# Supplementary material for: Optimal Modality for Detecting Distant Metastasis in Primary Nasopharyngeal Carcinoma during Initial Staging: A Systemic Review and Meta-analysis of 1774 Patients
Source: PubMed Central journal article supplement — J Cancer. 2017 Apr 10;8(7):1238–48. doi: 10.7150/jca.18361 (PMC5463439; doi:10.7150/jca.18361), 2017-04-10
Supplement: jcav08p1238s1.pdf [file jcav08p1238s1.pdf]

|            | Risk of Bias      |            |                    |                 | Applicability Concerns |            |                    |
|------------|-------------------|------------|--------------------|-----------------|------------------------|------------|--------------------|
|            | Patient Selection | Index Test | Reference Standard | Flow and Timing | Patient Selection      | Index Test | Reference Standard |
| Chen 2007  | ?                 | +          | ?                  | ?               | -                      | +          | +                  |
| Chua 2009  | +                 | +          | ?                  | ?               | +                      | +          | +                  |
| Lin 2009   | ?                 | +          | ?                  | ?               | +                      | +          | +                  |
| Lin 2012   | -                 | +          | ?                  | ?               | +                      | +          | +                  |
| Liu 2007   | ?                 | +          | ?                  | ?               | +                      | +          | +                  |
| Ng 2009    | ?                 | +          | ?                  | ?               | +                      | +          | +                  |
| Ng 2009    | +                 | +          | ?                  | ?               | +                      | +          | +                  |
| Tang 2013  | +                 | +          | ?                  | ?               | +                      | +          | +                  |
| Wang 2007  | ?                 | +          | ?                  | ?               | -                      | +          | +                  |
| Zhang 2011 | ?                 | +          | ?                  | ?               | +                      | +          | +                  |

  

|                                                                                          |                                                                                             |                                                                                         |
|------------------------------------------------------------------------------------------|---------------------------------------------------------------------------------------------|-----------------------------------------------------------------------------------------|
|  High |  Unclear |  Low |
|------------------------------------------------------------------------------------------|---------------------------------------------------------------------------------------------|-----------------------------------------------------------------------------------------|

**Supplementary Figure S1**

**Supplementary Table S1. Quality assessment of the included studies using the signalling questions of QUADAS-II**

| First author /year | Patient selection <sup>a</sup> |     |     | Index test <sup>b</sup> |     | Reference standard <sup>c</sup> |     | Flow and timing <sup>d</sup> |     |     |
|--------------------|--------------------------------|-----|-----|-------------------------|-----|---------------------------------|-----|------------------------------|-----|-----|
|                    | 1                              | 2   | 3   | 1                       | 2   | 1                               | 2   | 1                            | 2-3 | 4   |
| Chua/2009 [5]      | Y/Y                            | Y/Y | Y/Y | Y/Y                     | Y/Y | Y/Y                             | U/U | Y/Y                          | N/N | Y/Y |
| Ng/2009 [6]        | N/U                            | Y/Y | U/U | Y/Y                     | Y/U | Y/Y                             | U/U | Y/Y                          | N/N | Y/Y |
| Zhang/2011 [10]    | U/U                            | Y/Y | U/U | Y/Y                     | Y/U | Y/Y                             | U/U | Y/Y                          | N/N | Y/Y |
| Lin/2012 [8]       | U/U                            | N/Y | U/U | Y/Y                     | Y/U | Y/Y                             | U/U | Y/U                          | N/N | Y/Y |
| Tang/2013 [9]      | Y/Y                            | Y/Y | Y/Y | Y/Y                     | Y/Y | Y/Y                             | U/U | Y/Y                          | N/N | Y/Y |
| Chen/2007 [3]      | U/U                            | Y/Y | Y/Y | Y/Y                     | Y/Y | Y/Y                             | U/U | Y/U                          | N/N | Y/Y |
| Ng/2009 [7]        | Y/Y                            | Y/Y | Y/Y | Y/Y                     | Y/Y | Y/Y                             | U/U | Y/Y                          | N/N | Y/Y |
| Wang/2007 [11]     | U/U                            | Y/Y | U/N | Y/Y                     | Y/Y | Y/Y                             | U/U | Y/Y                          | N/N | Y/Y |
| Lin/2009 [12]      | U/U                            | Y/Y | U/U | Y/Y                     | Y/Y | Y/Y                             | U/U | U/N                          | Y/Y | Y/Y |
| Liu/2007 [4]       | U/U                            | Y/Y | Y/Y | Y/Y                     | Y/Y | Y/Y                             | U/U | Y/Y                          | N/N | Y/Y |

Abbreviations: QUADAS-II: Quality Assessment tool for Diagnostic Accuracy Studies version-II; Y: Yes; N: No; U: Unclear.

<sup>a</sup> 1: was a consecutive/random sample of patients enrolled; 2: was a case-control design avoided; 3: did the study avoid inappropriate exclusions.

<sup>b</sup> 1: were the index test results blind to the results of the reference standard; 2: was it pre-specified if a threshold was used.

<sup>c</sup> 1: is the reference standard correctly classify the target condition; 2: were the reference standard results blind to the results of the index test.

<sup>d</sup> 1: was there an appropriate interval between index test and reference standard; 2-3: did all patients receive the same reference standard; 4: were all patients included in the analysis.

**Supplementary Table S2. Comparison of three meta-analyses of <sup>18</sup>F-FDG PET/CT for detecting distant metastasis in nasopharyngeal carcinoma**

| First author /year    | No. of patients | Subject                         | Latest study | Language of studies | All newly diagnosed | Any stages | Only bones metastasis | M0 in CWUs | Quality assessment | Compared to CWUs |
|-----------------------|-----------------|---------------------------------|--------------|---------------------|---------------------|------------|-----------------------|------------|--------------------|------------------|
| Vellayappan/2014 [22] | 385             | PET/CT                          | 2011         | English & Chinese   | Yes                 | No         | No                    | Yes        | QUADAS-I           | No               |
| Shen/2014 [21]        | 1798            | PET/CT & PET alone <sup>a</sup> | 2012         | English & Chinese   | No                  | Yes        | Yes                   | Yes        | QUADAS-I           | No               |
| Our study             | 1774            | PET/CT                          | 2013         | English & Chinese   | Yes                 | Yes        | No                    | No         | QUADAS-II          | Yes              |

Abbreviations: <sup>18</sup>F-FDG: <sup>18</sup>F-fluorodeoxyglucose; PET: positron emission tomography; CT: computed tomography; M0: no distant metastasis; CWUs: conventional work-ups; QUADAS: Quality Assessment tool for Diagnostic Accuracy Studies.

<sup>a</sup> This meta-analysis reported pooled results of the subgroup of PET/CT which included patients with both newly diagnosed and recurrent disease.
